# Supplementary material for: Two genomic regions encoding exopolysaccharide production systems have complementary functions in B. cereus multicellularity and host interaction
Source: PubMed Central journal article supplement (PMC6976573; doi:10.1038/s41598-020-57970-3), 2020-01-22
Supplement: 41598_2020_57970_MOESM1_ESM.pdf [file 41598_2020_57970_MOESM1_ESM.pdf]

**Two genomic regions encoding exopolysaccharide production systems have complementary functions in *B. cereus* multicellularity and host interaction**

Caro-Astorga Joaquin, Álvarez-Mena Ana, Hierrezuelo Jesús, Guadix Juan Antonio, Heredia-Ponce Zahira, Arboleda-Estudillo Yohanna, González-Munoz Elena, de Vicente Antonio, and Romero Diego

**Supplemental material**

Supplemental figures

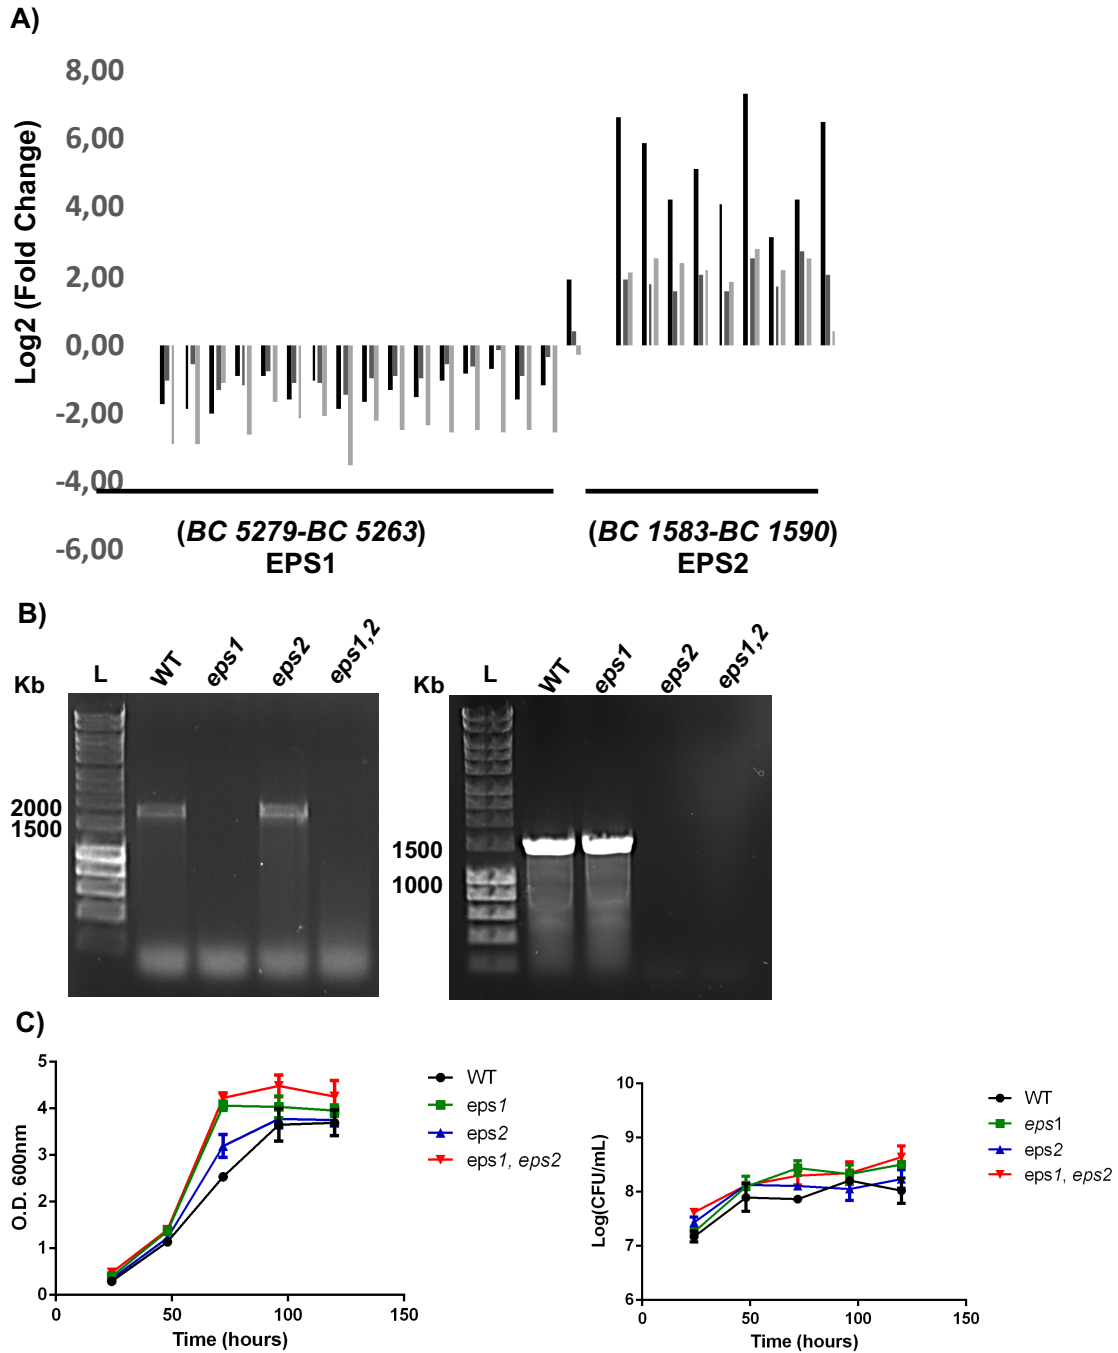

**Figure S1. Two genomic regions of *B. cereus* hypothetically committed to production of exopolysaccharides are differentially expressed in biofilm cells.** A) Transcriptomic analysis showed the specific overexpression of genes of the *eps2* region but not the *eps1* in biofilm cells compared to floating cells at 24 h (black), 48 h (dark grey) and 72 h (clear grey). B) Validation of the *eps* mutants in *B. cereus* strains. Amplifications correspond to *eps1* (left panel) (1683 bp) and *eps2* (right panel) (1419 bp) genomic regions. Sizes (Kb) are indicated. (L) Molecular Ladder. C) Dynamic of growth of *B. cereus* WT and *eps* mutants in the biofilm experimental conditions. Left: Measurement of optical density at 600 nm at 24h, 48h, 72h, 96h and 120h; right: Representation of the Log(CFU/ml) of *Bacillus* cells at these time points.

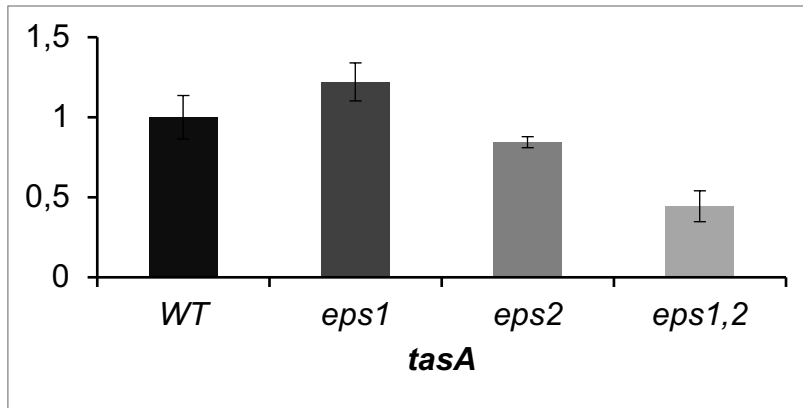

**Figure S2. Level of expression of *tasA* (BC\_1279) in *eps* mutants.** Levels of transcripts of *tasA* were analyzed by Q-RT-PCR. The data were normalized to the level of housekeeping gene *rpoA* and the fold change ratio was calculated from *eps1* (A), *eps2* (B) and *eps1,2* (C) mutants compared to wild-type (dashed line). Statistical analysis, ANOVA with post-hoc paired Student's test, didn't show any significant differences between the samples.

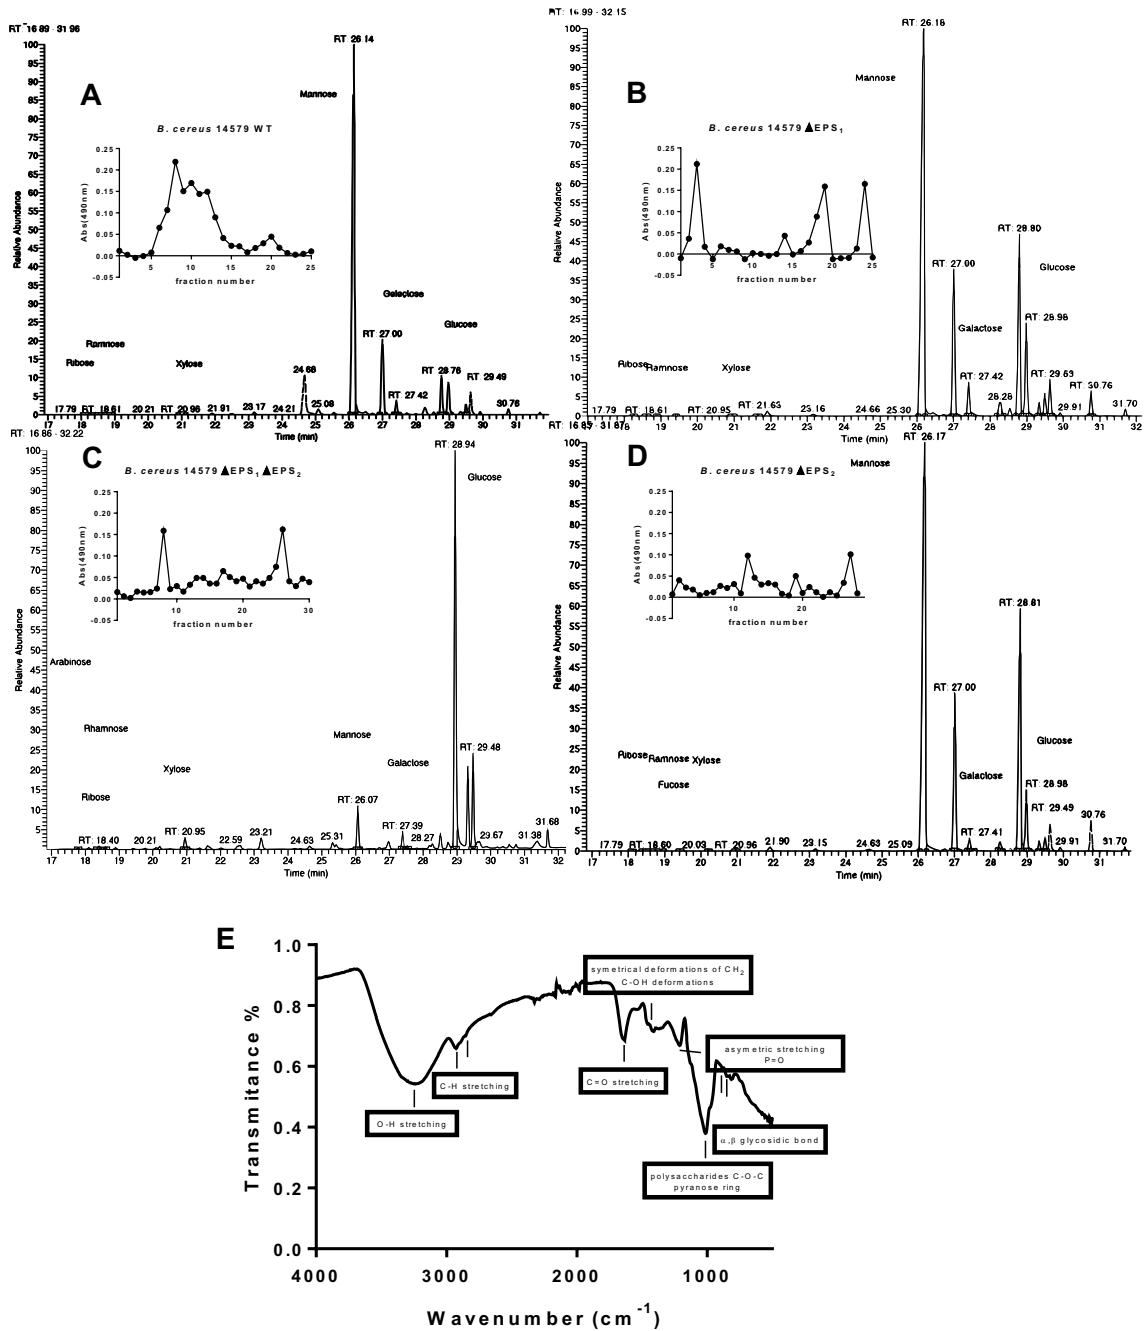

**Figure S3.** (A-D) Gas chromatograms of the fractions of exopolysaccharide (EPS) at higher molecular weight in gel filtration chromatography of *B. cereus* 14579 and mutants. The absorption at 490 nm of aliquots from the size exclusion column is represented above each chromatogram. (E) FT-IR spectrum of the extracted EPS in WT sample and most representative bands.



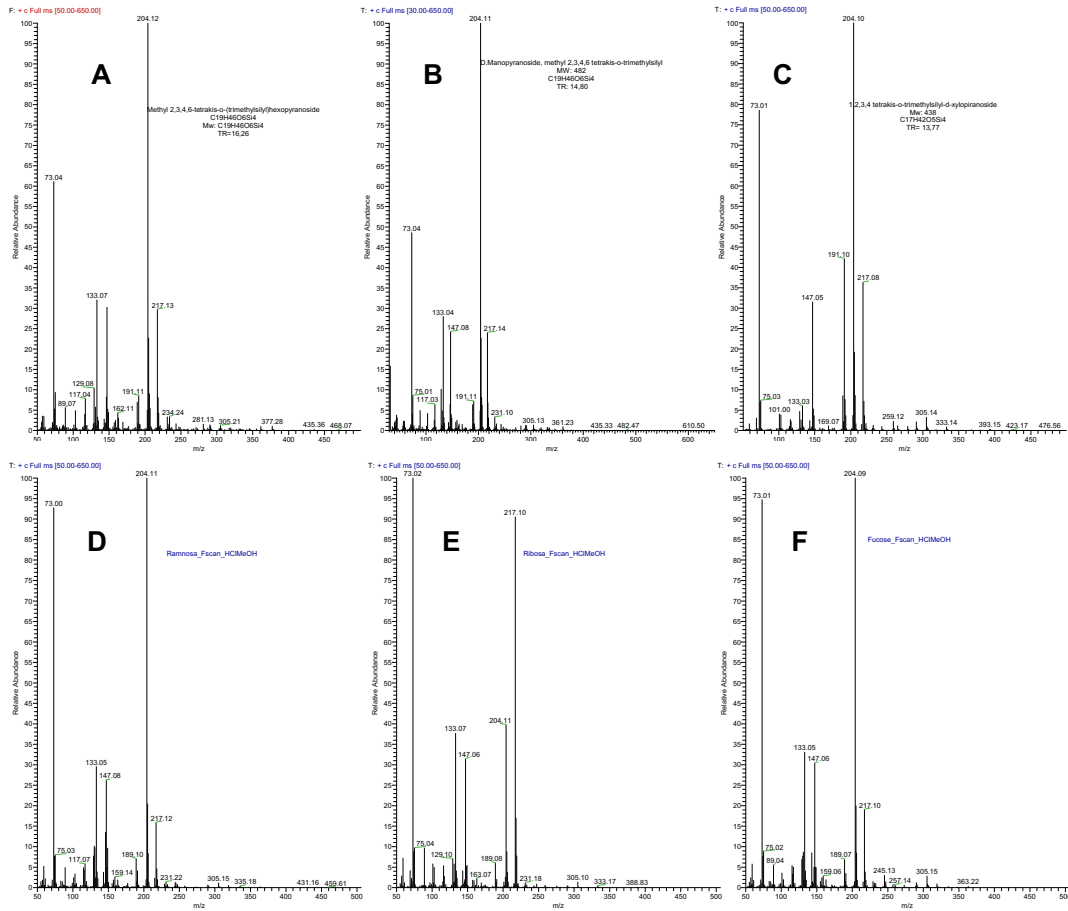

**G**

| Strain                                 | Glucose | Mannose | Galactose | Arabinose | Xylose | Rhamnose | Ribose | Fucose |
|----------------------------------------|---------|---------|-----------|-----------|--------|----------|--------|--------|
| <i>B. cereus</i> ATCC14579             | +       | +       | +         | -         | +      | +        | +      | -      |
| <i>B. cereus</i> ATCC14579 Δeps1       | +       | +       | +         | -         | +      | +        | +      | -      |
| <i>B. cereus</i> ATCC14579 Δeps2       | +       | +       | +         | -         | +      | +        | +      | +      |
| <i>B. cereus</i> ATCC14579 Δeps1 Δeps2 | +       | +       | +         | -         | +      | +        | +      | -      |

**Figure S4.** (A-F) Mass spectra of the glucose, mannose, xylose, rhamnose, ribose and fucose derivatives obtained after methanolysis and ionization by electronic impact (EI) in mass spectrometry. (G) Sugar unities identified in the EPS fractions produced by wild type and mutants strains.

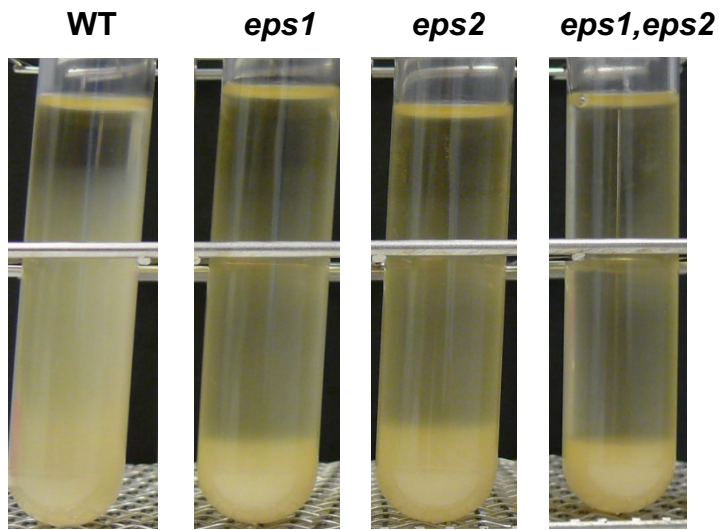

**Figure S5.** Eps1 and Eps2 prevent cellular auto-aggregation. Pictures of the tubes at 24 h of incubation at 30 °C and no agitation shows major aggregation of mutants than the WT.

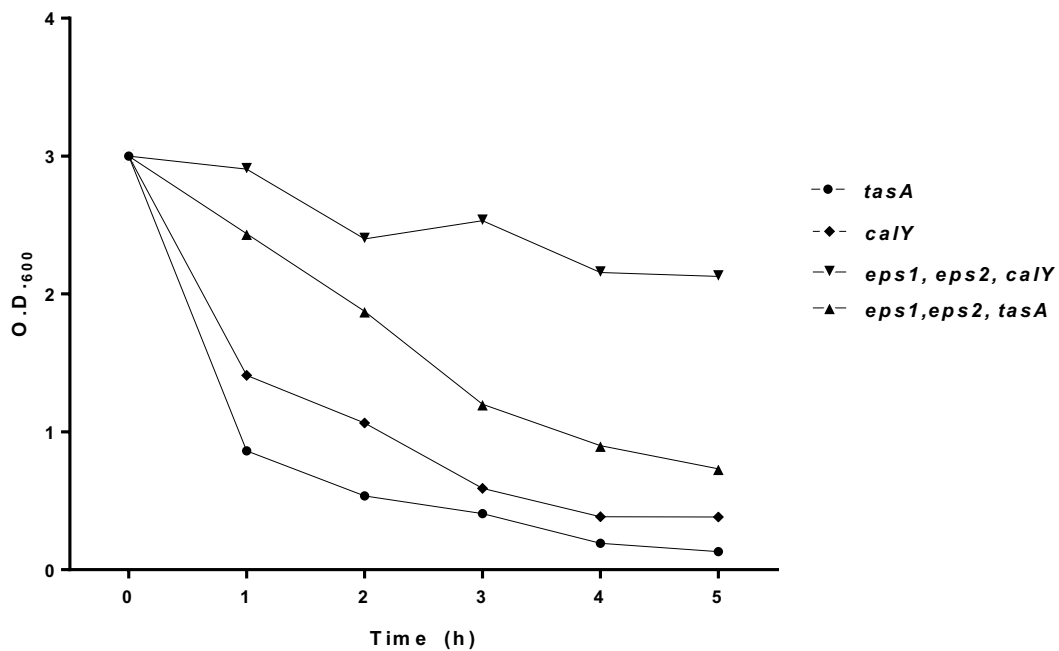

**Figure S6. EPS1 and EPS2 interact and affect cell aggregation.** OD measures of the air-liquid interface of cell suspensions in static conditions at room temperature. Cultures in TY were incubated at 150 rpm and 30 °C for 16 h and OD was adjusted to OD=3 before the experiment initiation.

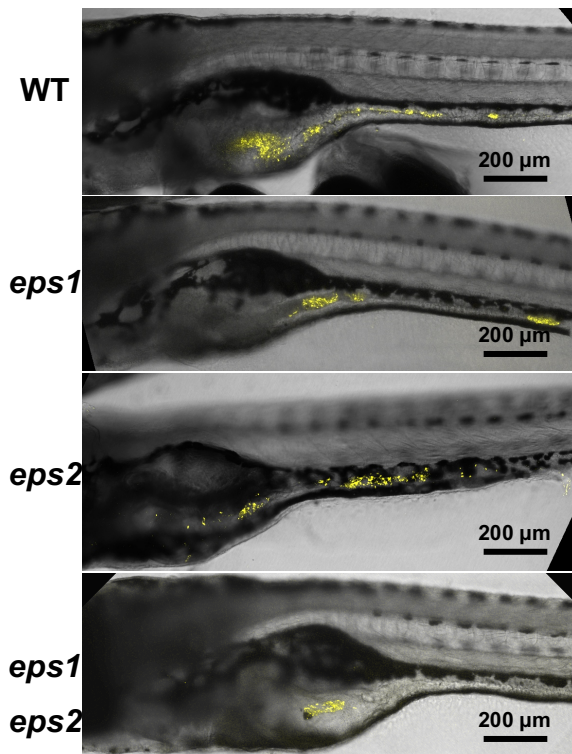

**Figure S7. The EPS2 is more relevant for adhesion of *B. cereus* to human epithelial cells and Zebrafish gut. Bacteria localization in zebrafish larvae gut after feeding.**

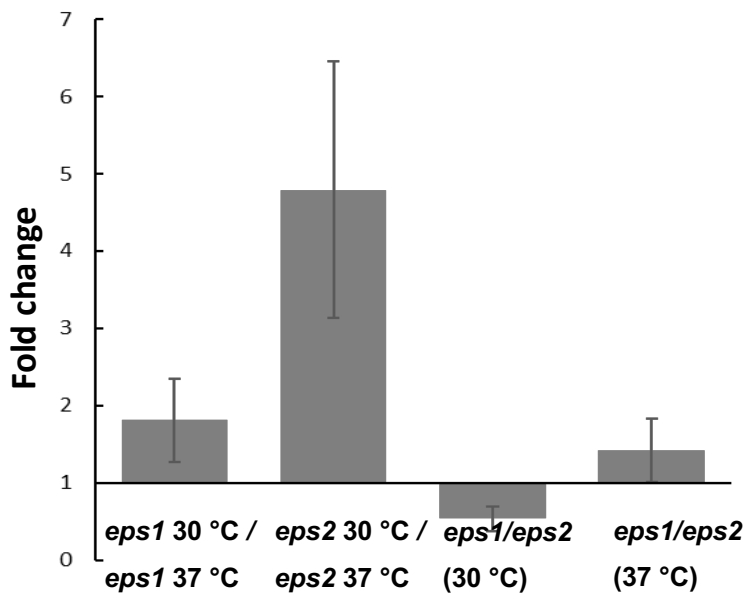

**Figure S8. *eps1* and *eps2* expression patterns varie depending on temperature. qRT-PCR analysis was done to determine the relative levels of transcripts of representative locus of the *eps1* or *eps2* genomic regions at 30 °C and 37 °C.**

## Supplemental Tables

**Table S1.** Bacterial strains used in this study.

| Strain                     | Genotype                                | Plasmid                     | Reference  |
|----------------------------|-----------------------------------------|-----------------------------|------------|
| <i>B. cereus</i> ATCC14579 |                                         |                             | This study |
| <i>B. cereus</i> ATCC14579 | $\Delta eps1$                           |                             | This study |
| <i>B. cereus</i> ATCC14579 | $\Delta eps2$                           |                             | This study |
| <i>B. cereus</i> ATCC14579 | $\Delta eps1 \Delta eps2$               |                             | This study |
| <i>B. cereus</i> ATCC14579 |                                         | pHCMC02-<br><i>Pupp-yfp</i> | This study |
| <i>B. cereus</i> ATCC14579 | $\Delta eps1$                           | pHCMC02-<br><i>Pupp-yfp</i> | This study |
| <i>B. cereus</i> ATCC14579 | $\Delta eps2$                           | pHCMC02-<br><i>Pupp-yfp</i> | This study |
| <i>B. cereus</i> ATCC14579 | $\Delta eps1 \Delta eps2$               | pHCMC02-<br><i>Pupp-yfp</i> | This study |
| <i>B. cereus</i> ATCC14579 | $\Delta flag$                           |                             | This study |
| <i>B. cereus</i> ATCC14579 | $\Delta eps1, \Delta flag$              |                             | This study |
| <i>B. cereus</i> ATCC14579 | $\Delta eps2, \Delta flag$              |                             | This study |
| <i>B. cereus</i> ATCC14579 | $\Delta eps1, \Delta eps2, \Delta flag$ |                             | This study |

**Table S2.** Primes used to mutate the *eps1* (BC5279-5274) and *eps2*(1583-1591) regions and flagellin.

| Mutations                            | Name                 | Primer sequence                                                   |
|--------------------------------------|----------------------|-------------------------------------------------------------------|
| $\Delta BC_{1583-1591}$              | Forward.up.Bam<br>HI | AAAAGGATCCGGGATGTTGCATAAGTCGAAC                                   |
| $\Delta BC_{1583-1591}$              | Reverse.up           | ATTGGCATTAAATCCAGCAAGGCCACGAGC<br>GATTAACCATTTC                   |
| $\Delta BC_{1583-1591}$              | Forward.dw           | CCTTGCTGGATTAATGCCAAT                                             |
| $\Delta BC_{1583-1591}$              | Reverse.dw.NcoI      | AAAACCATGGCTCTTT TTCATTACCTATAT<br>CCCCTA                         |
| $\Delta BC_{5279-5274}$              | Forward.up.Bam<br>HI | AAAAGGATCCTTTGAAAGAACTAAGGCTGA<br>CG                              |
| $\Delta BC_{5279-5274}$              | Reverse.up           | TGGTTTTCTTTTCTTTCTCCCGAACATAT T                                   |
| $\Delta BC_{5279-5274}$              | Forward.dw           | AAACCATTACGACAATTAATTACACATCAGATGA<br>GTCAAGA GAGTATTAGGAAAACC    |
| $\Delta BC_{5279-5274}$              | Reverse.dw.NcoI      | AAAACCATGGATGCAAAGGTAACGTGATT<br>TCATT                            |
| $\Delta flag$                        | Flag.up.fw           | CGATGCATGCCATGGTACCCTTATTTTGA<br>AACGTCGATATTTAATATTTTTTTAATATATC |
|                                      | Flag.up.rv           | AACACAGTAAGTGCTTGCATATAAGAAAG                                     |
|                                      | Flag.dw.fw           | ATGCAAGCACTTACTGTGTTACGGTCATAAC                                   |
|                                      | Flag.dw.rv           | CTTCTAGAATTCGAGCTCCCGTGGCACAGATTA<br>TGTATC                       |
| <b>Primers to validate mutations</b> |                      |                                                                   |
| <i>eps1</i>                          | Eps1 Fw              | TGTAACGGATGCGCAAATTA                                              |
|                                      | Eps1 Rv              | TTCGCAAGAATTTGTGCATC                                              |
| <i>eps2</i>                          | Eps2 Fw              | TGTTTTGAGCGGATTTGTTTTGT                                           |
|                                      | Eps2 Rv              | GATTGCTCTGCCAATGTCTTT                                             |

**Table S3.** Primes used for the construction of the plasmid pHCMC02-*Pupp-yfp*.

| <b>Name</b>     | <b>Primer sequence</b>                         |
|-----------------|------------------------------------------------|
| Prom.upp.Fw     | AAAAAGCTAGCGGATGAAATTGCGTCA                    |
| Prom.upp-yfp.Rv | CATAGTAGTTCCTCCTTATGTAGATGATA<br>TTCATGCGTTTGC |
| yfp.Fw          | ACATAAGGAGGAACTACTATGAGT                       |
| yfp.Rv          | GCGCTCACCCGGGTTATTTGTATAG                      |

**Table S4.** Primers used for RT-PCR assays.

| <b>Name</b>     | <b>Primer sequence</b>     |
|-----------------|----------------------------|
| BC_1583_fw      | TGTTTTGAGCGGATTTGTTTTGT    |
| BC_1583_rv      | GTCCACGAGCGATTAAACCA       |
| Interg_83-84_fw | ATTCAGAAAAGGGCGGTGAAAT     |
| Interg_83-84_rv | AGCGGTAAACAACACATCGT       |
| BC_1584_fw      | AAAATCTCGTTGTGAATACGG      |
| BC_1584_rv      | GATTGCTCTGCCAATGTCTTT      |
| Interg_84-85_fw | TCGAGGTGAACATGTCCGATG      |
| Interg_84-85_rv | CACCTCTGTCCTTCGTTGAA       |
| BC_1585_fw      | ACATACAGGGACGCCTTTAGT      |
| BC_1585_rv      | AACCACTCCATCGCATTTC        |
| Interg_85-86_fw | TTGAATGTGGGGGTAACGAT       |
| Interg_85-86_rv | CAAACAAGCGTTTTACTTTCG      |
| BC_1586_fw      | CCCTAGACCAGAGAGAGATTTT     |
| BC_1586_rv      | CCCTCCATTTATTTGTGCCCA      |
| Interg_86-87_fw | TGAACGGTAATGGTGCAAGA       |
| Interg_86-87_rv | AAACTGACGGCCTGAAGAAG       |
| BC_1587_fw      | GAATGCAGTAGAACCACTCCAAA    |
| BC_1587_rv      | CGTCGTTAAACCGTCAGCAA       |
| Interg_87-88_fw | CGCAAAAAGGATTATATTACGAA    |
| Interg_87-88_rv | GAAGAATAATCCATCCCATTGA     |
| BC_1588_fw      | CGCAGCATACTTTGTTTCGTG      |
| BC_1588_rv      | ACCATCTATCTTCCCTTCCTT      |
| Interg_88-89_fw | CGCAGCATACTTTGTTTCGTG      |
| Interg_88-89_rv | GAAGAATAATCCATCCATCCCATTGA |
| BC_1589_fw      | TGTTCAACCGACCAATCTGC       |
| BC_1589_rv      | TGCGGCAACCATATATCATCAC     |
| Interg_89-90_fw | GAAGAATAATCCATCCATCCCATTGA |
| Interg_89-90_rv | GCCATCGCTTCAATTACTACCA     |
| BC_1590_fw      | ATTCAGAGCCGCATGAGTTT       |
| BC_1590_rv      | GCCATCGCTTCAATTACTACCA     |
| Interg_90-91_fw | TTTAATATCTGAATATTGCGAAT    |
| Interg_90-91_rv | AATTTGCAGGGTTACGGTAGG      |
| BC_1591_fw      | TTTAATATCTGAATATTGCGAAT    |
| BC_1591_rv      | TTGGACCTGCTGCCATTAAG       |
| BC_5279_fw      | TCGGACAACAAGGAAAGAAAGT     |
| BC_5279_rv      | TTGGACCTGCTGCCATTAAG       |
| Interg_79-78_fw | CTCGGAGTCGTTTTGAATGAT      |
| Interg_79-78_rv | CGAGGATCATTGCTAAACGTT      |
| BC_5278_fw      | GCTTCAGTTGGTCTTGCACTCT     |
| BC_5278_rv      | TCTTGATGATGGAGCGTGTGA      |
| Interg_78-77_fw | GCTTCAGTTGGTCTTGCACTCT     |
| Interg_78-77_rv | AGAAGCATCACATACATTTGCCA    |
| BC_5277_fw      | ATCCCACCAAATCCAGCAGA       |
| BC_5277_rv      | AGAAGCATCACATACATTTGCCA    |

|                 |                         |
|-----------------|-------------------------|
| Interg_77-76_fw | TATTACTACGGTGCAAACCTAG  |
| Interg_77-76_rv | GTGACAATGTAAATCTATCAT   |
| BC_5276_fw      | GCACAAAAAGCCGCTTCAGA    |
| BC_5276_rv      | TAACCTGACTTCTTGCCCCG    |
| Interg_76-75_fw | TGGTGATGTCTCCTAACCGT    |
| Interg_76-75_rv | TAATGAGAGCCGTCTTCGATA   |
| BC_5275_fw      | GCAAGGAACAGCACCATCAA    |
| BC_5275_rv      | CCCGCACCTGTTTGTGATT     |
| Interg_75-74_fw | TGTTGGGGAGAAGTTTGGAT    |
| Interg_75-74_rv | ACTCAATATACCTGTTCCCTTCT |
| BC_5274_fw      | CTAGGGAGAGAGCCTGTTCA    |
| BC_5274_rv      | CCCCAGCACCCGTTATTA      |
| Interg_74-73_fw | CCTTATTAGATTTTGCGAATA   |
| Interg_74-73_rv | GTCTGGTGGAGAAAACGGGA    |
| BC_5273_fw      | CCGTTTTCTCCACCAGACATT   |
| BC_5273_rv      | ACCGCTTTATTTGTCCCAACA   |
| Interg_73-72_fw | AATGAAATCACGTTACCTTTGCA |
| Interg_73-72_rv | TGAACTGCTGCAACTCCTAG    |
| BC_5272_fw      | ACAAGGGCAAAGAGGGGTAA    |
| BC_5272_rv      | CCAAGTTTCTCTATCGGACGC   |
| Interg_72-71_fw | CGTCCAGTAAATGGTAAAAATGA |
| Interg_72-71_rv | TAGAAAACCCGTTCCACCAG    |
| BC_5271_fw      | TTGGCCTGTGAGCATATTGG    |
| BC_5271_rv      | TCACCATGAAATGCTTGTCTGA  |
| Interg_71-70_fw | TTGGCCTGTGAGCATATTGG    |
| Interg_71-70_rv | CAGAGGCTGCCGTTAAGAAT    |
| BC_5270_fw      | ACAATGGAGCAACGTGTGAA    |
| BC_5270_rv      | CAGAGGCTGCCGTTAAGAAT    |
| Interg_70-69_fw | ACAATGGAGCAACGTGTGAA    |
| Interg_70-69_rv | ACATCCATTGCACGACTTTCA   |
| BC_5269_fw      | GGACTGTCCCTGAAAATGTTGT  |
| BC_5269_rv      | ACATCCATTGCACGACTTTCA   |
| Interg_69-68_fw | CTTGGGAAGTCTAGTTCTGGG   |
| Interg_69-68_rv | TGCAAGTCCTATTACCCTCCT   |
| BC_5268_fw      | TTAGGAGCCTGGATGTGTCT    |
| BC_5268_rv      | CGTTGTCGTTTGAACCCTTTT   |
| Interg_68-67_fw | AAAAAAGGGTTCAAACGACAAC  |
| Interg_68-67_rv | TCTGTAGATCCGTCATTTACCA  |
| BC_5267_fw      | TTGGTAAATGACGGATCTACAGA |
| BC_5267_rv      | TCAATCCTACATTTCTCGCAGA  |
| Interg_67-66_fw | GAATGCTAAACCAAGTAACTAA  |
| Interg_67-66_rv | TAGCAATAAATGTATAAGAG    |
| BC_5266_fw      | TTTCCTGCTTTACGTCGTACATC |
| BC_5266_rv      | CGGTAACCACGCTGATAGGA    |
| Interg_66-65_fw | ATGCTCATGAAATCTAAATGA   |
| Interg_66-65_rv | AATAGGATTTTCTTTTTCAT    |



|                 |                       |
|-----------------|-----------------------|
| BC_5265_fw      | CAGTTGGTGGGGTAGATGTCA |
| BC_5265_rv      | AACAGCTTGCATCACTTGGC  |
| Interg_65-64_fw | GAGCGCATCTTGAAGTGACC  |
| Interg_65-64_rv | CGCTCACAATCGAAGCAACA  |
| BC_5264_fw      | GCAACAGGACAAACGAGTGA  |
| BC_5264_rv      | TGCCTTTTTATCCTCAGCAGC |
| Interg_64-63_fw | GGACATGATGTTTGGGCGAA  |
| Interg_64-63_rv | TATAGCCAGCTCCACCACAG  |
| BC_5263_fw      | CTGTGGTGGAGCTGGCTATA  |
| BC_5263_rv      | CGCCTTCCGTAATTGCATCT  |

---
